# Supplementary material for: Hypocomplementemia is associated with more severe renal disease and worse renal outcomes in patients with ANCA-associated vasculitis: a retrospective cohort study
Source: PubMed Central journal article supplement (PMC7472496; doi:10.1080/0886022x.2020.1803086), 2020-08-13
Supplement: IRNF_A_1803086_SM9783.pdf [file IRNF_A_1803086_SM9783.pdf]

Supp Table 1

C3 and C4 levels value at diagnosis

| Total<br>n=47 | C3 level mg/dl<br>(normal range 75-180) | C4 level mg/dl<br>(normal range 10-40) |
|---------------|-----------------------------------------|----------------------------------------|
| 1             | 119                                     | 17                                     |
| 2             | 118                                     | 24.9                                   |
| 3             | 153                                     | 36.2                                   |
| 4             | 152                                     | 35.5                                   |
| 5             | 131                                     | 45.1                                   |
| <b>6</b>      | <b>74</b>                               | <b>19.7</b>                            |
| 7             | 150                                     | 50                                     |
| 8             | 108                                     | 27.5                                   |
| 9             | 160                                     | 41.8                                   |
| 10            | 149                                     | 27                                     |
| 11            | 79                                      | 17.6                                   |
| 12            | 133                                     | 27                                     |
| 13            | 156                                     | 27.2                                   |
| 14            | 128                                     | 32.4                                   |
| 15            | 164                                     | 24.9                                   |
| 16            | 95                                      | 21.4                                   |
| 17            | 159                                     | 17.4                                   |
| 18            | 150                                     | 30                                     |
| 19            | 111                                     | 37.2                                   |
| 20            | 144                                     | 31                                     |
| 21            | 115                                     | 46                                     |
| 22            | 138                                     | 23                                     |
| 23            | 106                                     | 16.1                                   |
| 24            | 131                                     | 24                                     |

|           |           |             |
|-----------|-----------|-------------|
| 25        | 100       | 38          |
| 26        | 109       | 21.2        |
| 27        | 82        | 18.2        |
| 28        | 155       | 32.9        |
| <b>29</b> | <b>48</b> | <b>8.2</b>  |
| <b>30</b> | <b>58</b> | <b>18.7</b> |
| <b>31</b> | <b>58</b> | <b>16.2</b> |
| 32        | 112       | 25.9        |
| 33        | 116       | 25.4        |
| <b>34</b> | <b>65</b> | <b>11.9</b> |
| 35        | 168       | 48.5        |
| 36        | 136       | 39.8        |
| 37        | 118       | 32.7        |
| 38        | 131       | 36.1        |
| 39        | 118       | 32.7        |
| 40        | 131       | 36.1        |
| <b>41</b> | <b>67</b> | <b>21</b>   |
| <b>42</b> | <b>58</b> | <b>13</b>   |
| 43        | 110       | 18          |
| <b>44</b> | <b>72</b> | <b>10</b>   |
| <b>45</b> | <b>56</b> | <b>14.8</b> |
| <b>46</b> | <b>63</b> | <b>20.7</b> |
| <b>47</b> | <b>74</b> | <b>14.1</b> |

C3, complement 3; C4, complement 4. Patients with hypocomplementemia are marked in bold.
